# Supplementary material
Source: Springer Nature journal article supplement (https://www.springermedizin.de/resource/supplementary/13012_2010_303_MOESM1_ESM.pdf/9629676)
Supplement: MOESM1 [file 9629676]

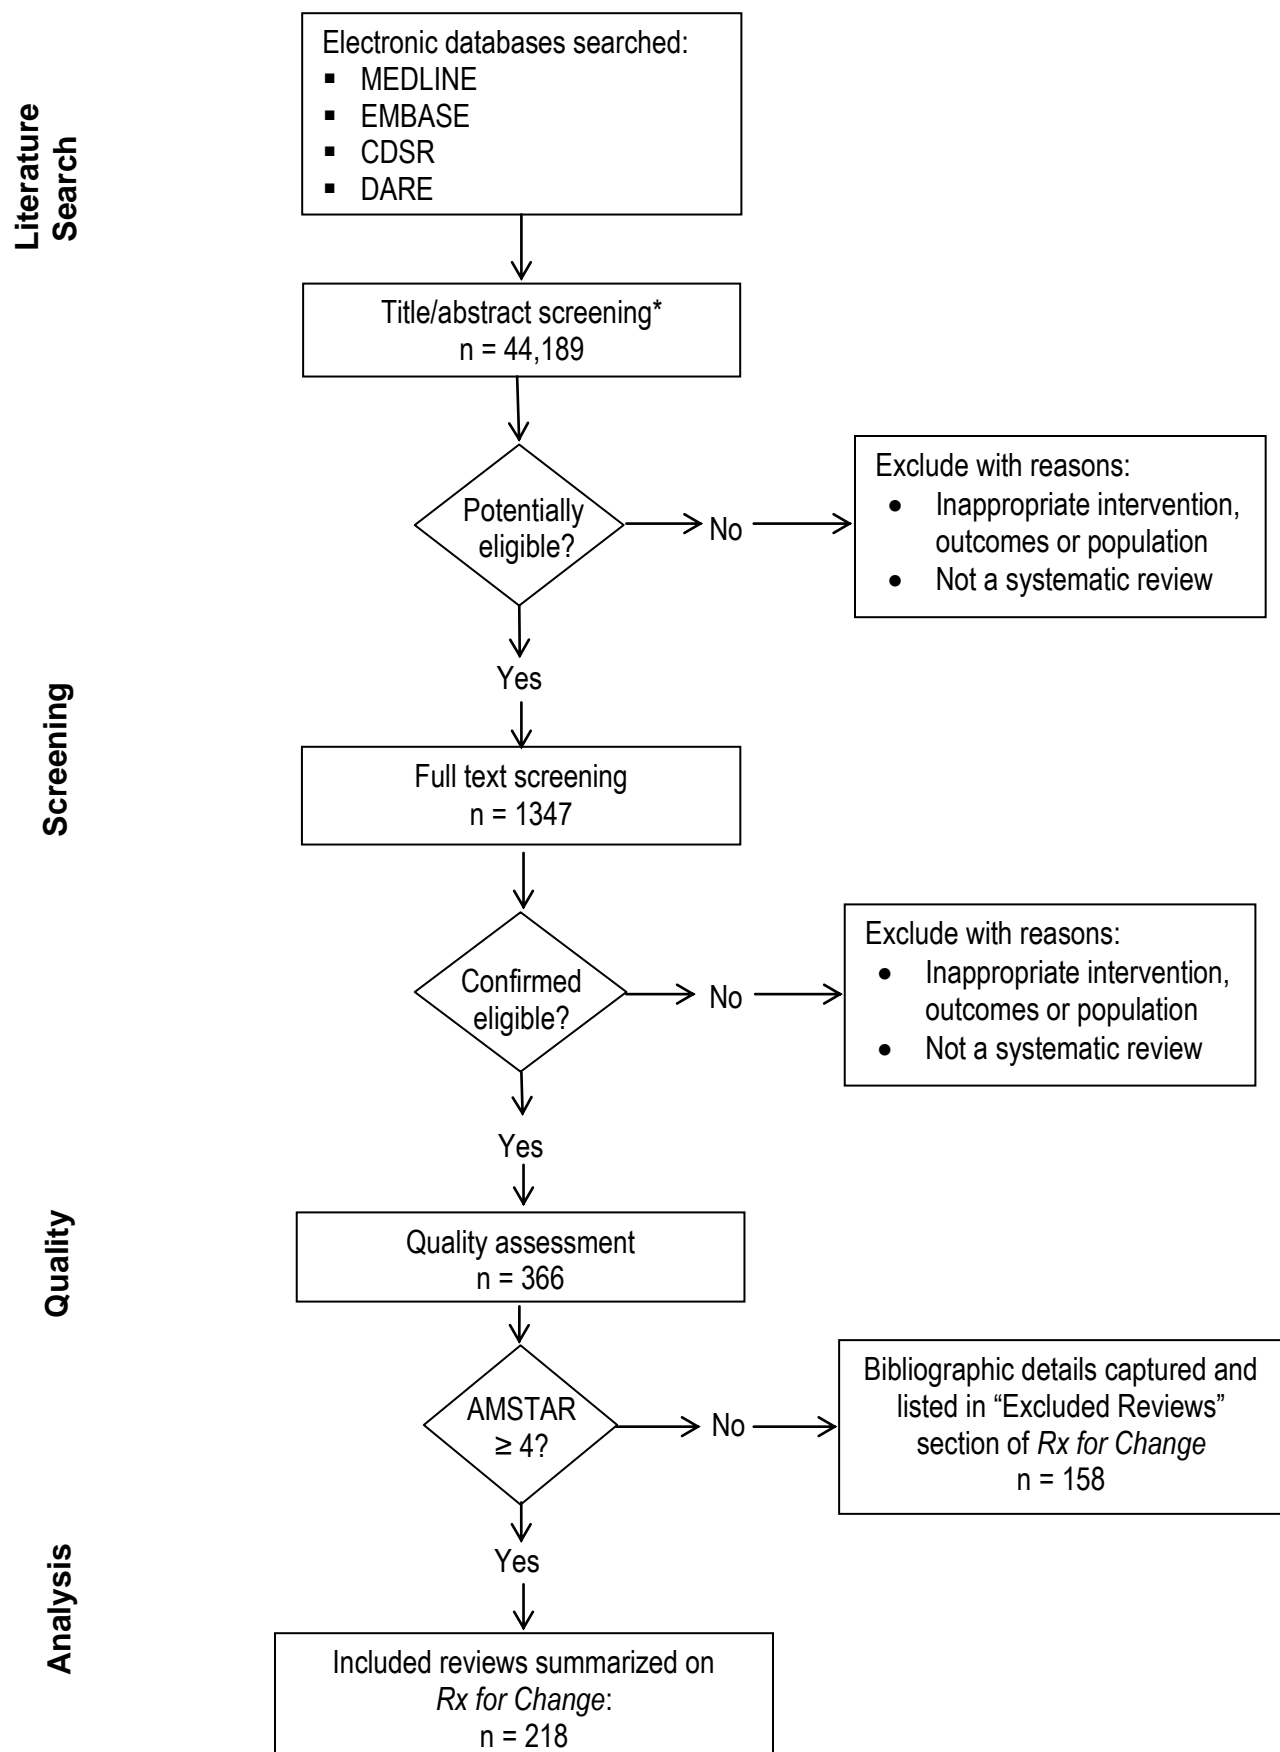

\* The consumer reviews are screened in two further steps, details are available at:  
<http://www.cadth.ca/index.php/en/compus/interventions/interventions-directed-to-consumers>
